# Supplementary material
Source: PubMed Central journal article supplement (PMC4564681)
Supplement: mmc2.pdf [file mmc2.pdf]

## Article

## Slow Internal Dynamics and Charge Expansion in the Disordered Protein CGRP: A Comparison with Amylin

Sara M. Sizemore,<sup>1,2</sup> Stephanie M. Cope,<sup>1,2</sup> Anindya Roy,<sup>4</sup> Giovanna Ghirlanda,<sup>3</sup> and Sara M. Vaiana<sup>1,2,\*</sup>

<sup>1</sup>Center for Biological Physics, <sup>2</sup>Department of Physics, and <sup>3</sup>Department of Chemistry and Biochemistry, Arizona State University, Tempe, Arizona; and <sup>4</sup>Department of Biochemistry, Molecular Engineering and Sciences, University of Washington, Seattle, Washington

**ABSTRACT** We provide the first direct experimental comparison, to our knowledge, between the internal dynamics of calcitonin-gene-related peptide (CGRP) and amylin (islet amyloid polypeptide, IAPP), two intrinsically disordered proteins of the calcitonin peptide family. Our end-to-end contact formation measurements reveal that in aqueous solution (i.e., in the absence of structure-inducing organic solvents) CGRP preferentially populates conformations with short end-to-end distances. However, the end-to-end distance of CGRP is larger than that of IAPP. We find that electrostatic interactions can account for such a difference. At variance with previous reports on the secondary structure of CGRP, we find that the end-to-end distance of the peptide increases with decreasing pH and salt concentration, due to Coulomb repulsion by charged residues. Interestingly, our data show that the reconfiguration dynamics of CGRP is significantly slower than that of human IAPP in water but not in denaturant, providing experimental evidence for roughness in the energy landscape, or internal friction, in these peptides. The data reported here provide both structural and dynamical information that can be used to validate results from molecular simulations of calcitonin family peptides in aqueous solution.

### INTRODUCTION

Calcitonin-gene-related peptide (CGRP) is an intrinsically disordered neuropeptide of the calcitonin peptide (Ct) family, produced in the central and the peripheral neurons. It is involved in the transmission of pain signals in the nervous system and acts as a vasodilator upon binding to the CGRP receptor (1,2). Because it triggers migraine attacks, CGRP has recently become a major therapeutic target for the prevention of migraines (3,4). CGRP is a member of the Ct family, which includes calcitonin, CGRP; adrenomedullin; intermedin; and amylin (i.e., islet amyloid polypeptide, IAPP). These are structurally and genetically related intrinsically disordered hormone peptides, which share sequence homology ranging between 20 and 50% (5–7). Some Ct family members, including IAPP, have been shown to bind to the CGRP receptor and are able to activate cell response, though with varying degrees of affinity (5,8). Understanding the cross reactivity of CGRP and IAPP is of considerable interest to drug development (7,8). Although the precise mechanism of receptor binding and activation is not yet known, cross reactivity between these two peptides and their receptors has been attributed to their sequence homology (47%) and possible structural similarities (5,8). Because in physiological conditions these peptides are intrinsically disordered, binding to their receptors (or to drugs) will depend strongly on the structural and the dynamical properties of their disordered unbound state.

Detecting such properties is challenging because Ct peptides have a low molecular mass (~4 kDa) and sample a large ensemble of conformations on fast timescales. While some experimental information is available on the unbound disordered state of IAPP in solution (9–14), very little is known about CGRP. With the exception of low-resolution circular-dichroism (CD) experiments (15–18), no direct comparison exists between IAPP and CGRP in aqueous solvent (i.e., in the absence of helix-inducing solvents). A direct comparison of the structural and dynamical properties of these two peptides is also of more general biophysical interest (these peptides have the same contour length, yet differ in both charged and hydrophobic residue content).

The sequences of CGRP and IAPP are shown in Fig. 1 for comparison. Under physiological conditions, both peptides are amidated at the C-terminus and contain a disulfide bond at the N-terminus, between C2 and C7. This constrains residues 1–7 into an essentially rigid, ringlike structure (N\_loop) (19–21). An intact disulfide bond is required for the peptides to activate cell response upon binding to the receptors (8,22–24). By combining two-dimensional solution nuclear magnetic resonance (NMR), Fourier transform infrared spectroscopy, and CD experiments with replica exchange molecular dynamics simulations, we have recently proposed a structural model of the N\_loop of IAPP (21). In the absence of residues 9–37, this structure is conducive to self-aggregation and leads to the formation of extremely stable non-amyloid fibers (21). In the context of the full-length peptide, the N\_loop structure favors interactions with disordered backbone groups (12). The sequence of

Submitted May 22, 2015, and accepted for publication July 1, 2015.

\*Correspondence: sara.vaiana@asu.edu

Editor: Elizabeth Rhoades.

© 2015 by the Biophysical Society  
0006-3495/15/09/1038/11

<http://dx.doi.org/10.1016/j.bpj.2015.07.023>

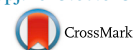

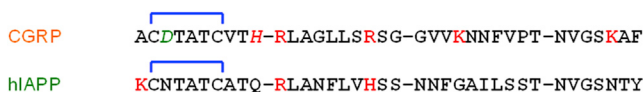

FIGURE 1 Sequences of CGRP and hIAPP. C2–C7 disulfide bond (blue). Charged residues (red, positive; green, negative). The N-terminus is free while the C-terminus is amidated. In our experiments, residue 37 is mutated to W. To see this figure in color, go online.

the N\_loop of CGRP is almost identical to that of IAPP (Fig. 1), suggesting a similar N\_loop structure. Following this structured region, the linear portion of the sequence (residues 8–37) is disordered in both peptides, with a somewhat higher propensity to locally sample  $\alpha$ -helical dihedral angles in the N-terminal half of the sequence (relative to random coil). The precise region of the sequence involved in helical sampling varies with the peptide, and the amount of helicity depends strongly on the solvent. This is reflected in the CD spectra of the peptides, which indicate a disordered structure with a small percentage of apparent  $\alpha$ -helical content in water. The helical content increases in the presence of helix-inducing solvents, such as TFE (trifluoroethanol), HFIP (hexafluoroisopropanol), DMSO (dimethyl sulfoxide), or SDS (sodium dodecyl sulfate) micelles and other membrane-mimicking solvents (15–17,25–28). Secondary chemical shifts from two-dimensional NMR experiments of IAPP in aqueous solution indicate a modest helical propensity in residues 5–19, indicating transient helical sampling in this region (10,11). In the presence of diphenylamine-2-carboxylate vesicles and other membrane-mimicking environments, this region assumes a well-defined  $\alpha$ -helix conformation (27,29). At variance with human IAPP (hIAPP), NMR experiments of CGRP in aqueous solution failed to detect sequential nuclear Overhauser effects. This is consistent with rapid conformational fluctuations and/or with a lack of well-defined three-dimensional structure (19). In 50% TFE/50% H<sub>2</sub>O solutions, residues 8–18 of CGRP assume a well-defined helical structure while residues thereafter remain largely disordered (19). A similar helical region is observed in 100% DMSO (20). While two-dimensional NMR has provided important information on the local (secondary) structural preferences of CGRP in the presence of helix-inducing solvents, no experimental information is available (to our knowledge) on the nonlocal (i.e., long-range, or tertiary) structural properties of CGRP, nor on the dynamics of conformational sampling under near-native solution conditions. A direct comparison of these properties in CGRP and IAPP is missing. Nonlocal interactions and large-scale conformational motions are expected to play an important role in intrinsically disordered protein (IDP) function and binding (30–37). Moreover, understanding how specific changes in the sequence affect the structure and dynamics of disordered and unfolded states in proteins is a problem of general biophysical interest (38–55).

Here we study the long-range conformational and dynamical properties of CGRP in solution under near-native solu-

tion conditions (in the absence of helix-inducing solvents), and we compare them to those previously measured for IAPP under identical solution conditions (12). For this purpose, we use the same nanosecond laser-pump spectroscopy technique, based on tryptophan triplet quenching by cystine (TCQ) (56,57), previously used to study IAPP (12). This technique provides a measure of the rate of end-to-end contact formation and of the relative end-to-end distance of the peptide at equilibrium. The advantage of this technique over Förster resonance energy transfer and fluorescence correlation spectroscopy combined is that it uses the phosphorescence properties of natural amino acids, so it does not require labeling these small proteins with large prosthetic dyes, and it provides the short-distance sensitivity required to study Ct peptides, which are only 37 residues long.

## MATERIALS AND METHODS

### Samples

Peptides (with N-terminal amidation, W37 mutation, and with a disulfide between C2 and C7) were either synthesized by Fmoc (9-fluorenylmethoxycarbonyl) solid peptide synthesis and then purified and lyophilized (as described in the Supporting Material), or else purchased from GenScript (Piscataway, NJ). For TCQ experiments, samples were prepared by dissolving the lyophilized peptide directly into freshly filtered buffer (0.2  $\mu$ m Millex-GV; Millipore, Billerica, MA). The peptide concentration was measured by absorbance and adjusted to 100  $\mu$ M if needed ( $\epsilon = 5774 \text{ cm}^{-1} \text{ mol}^{-1}$ ). Buffer was 50 mM NaAc at pH 3 or 4.9, or 20 mM NaPO<sub>4</sub> pH 8 (Sigma-Aldrich, St. Louis, MO). Guanidinium chloride (Sigma-Aldrich) GdmCl solutions were prepared at 6 M in 50 mM NaAc, pH 4.9. Salt was 99.0% purity KCl (Sigma-Aldrich). Solutions at different viscosities were prepared by varying the sucrose concentration from 0 to 40% w/v in buffers, and 0–32% w/v in 6 M GdmCl. In all cases the pH of the solution was measured and adjusted if needed (Accumet BASIC AB15 pH meter; Thermo Fisher Scientific, Waltham, MA). Fresh samples were immediately filtered (Anotop 10 0.2  $\mu$ m; Whatman, Little Chalfont, Buckinghamshire, UK) into gas tight cuvettes, deoxygenated by bubbling in NO for at least 2 h, and used immediately for TCQ measurements.

### End-to end contact formation by Trp-Cystine quenching

As described elsewhere, the tryptophan triplet state is quenched by close contact with cysteine and disulfides (at distances  $<0.4 \text{ nm}$ ) (12,56–58). After nanosecond ultraviolet excitation of W37 to the triplet state, this can contact C2–C7 at a rate  $k_{D+}$  (by diffusion), and either be quenched with a rate  $q$  or diffuse away with a rate  $k_{D-}$  (59) (Fig. 2)

The observed lifetime of the W-triplet state,  $1/k_{\text{obs}}$ , is

$$\frac{1}{k_{\text{obs}}} = \frac{k_{D-} + q}{qk_{D+}} = \frac{1}{k_R} + \frac{1}{k_{D+}}$$

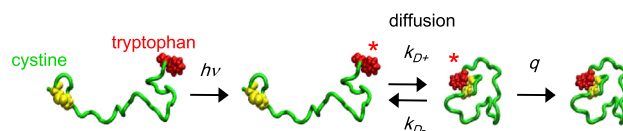

FIGURE 2 Kinetic scheme of tryptophan triplet quenching by cystine (TCQ) experiment. Tryptophan (W37) side chain is represented in red, cystine (C2–C7) in yellow.

where  $k_R = q(k_{D+}/k_{D-})$  is the reaction-limited rate and depends on the probability of forming a contact at equilibrium,  $k_{D+}/k_{D-}$ , and on the quenching rate upon contact,  $q$ . Because  $k_R$  is independent of the solvent viscosity ( $\eta$ ) while  $k_{D+}$  is a function of  $\eta$ , one can experimentally obtain  $k_R$  and  $k_{D+}$  by measuring  $k_{\text{obs}}$  as a function of solvent viscosity (57). In the limit for  $\eta \rightarrow 0$ ,  $1/k_{D+}(\eta)$  will be a linear function of  $\eta$ . Plotting  $1/k_{\text{obs}}$  as a function of viscosity therefore yields  $1/k_R$  as the intercept and  $1/\eta k_{D+}$  as the slope in the limit for zero viscosity. We note that for all peptides and solution conditions presented throughout this work,  $1/k_{\text{obs}}$  was found to be a linear function of  $\eta$ , with no apparent curvature (Fig. S3 in the Supporting Material).

### Meaning of $k_R$ and its relation to the end-to-end distance

From the definition of  $k_R$  above, it follows that, for peptides with identical quenchers,  $k_R$  directly measures the probability of forming a contact. If we describe the contact formation as a one-dimensional diffusion along the end-to-end distance coordinate,  $k_R$  can be related to the end-to-end distance distribution  $P(r)$  by (57)

$$k_R = \int_a^{l_c} P(r)q(r)dr, \quad (1)$$

where  $q(r)$  is the distance-dependent quenching rate (measured by Lapidus et al. (58)),  $a$  is the distance of van der Waals contact, and  $l_c$  is the contour length of the peptide. In this work we provide an empirical (model-free) comparison between measured  $k_R$  values for different peptides, as well as  $P(r)$  distributions estimated from Eq. 1, in the simple case of a Gaussian  $P(r)$ .

### Meaning of $k_{D+}$ and relation to end-to-end distance

The average time for contact formation between the two ends of the chain is  $1/k_{D+}$ . This depends on the probability of forming a contact (i.e., on  $P(r)$ ) and on the intrinsic rate at which the polypeptide backbone can reconfigure itself. That is, if the two ends of the peptide are close together the contact formation time will be shorter than if they are farther apart, even if the intrachain diffusion coefficient is the same. For example, in the framework of SSS theory (57), describing the contact formation as one-dimensional diffusion along the end-to-end distance coordinate, the reaction-limited rate  $k_{D+}$  can be related to  $P(r)$  and to the intrachain diffusion coefficient  $D$ . Alternative models can be used to describe the intrachain dynamics (52). A detailed description of these can be found elsewhere in Cheng et al. (52) and Lapidus et al. (57) and goes beyond the scope of this article, which is to present an empirical (model-free) comparison between measured  $k_{D+}$  values for different peptides of the same length.

### TCQ experimental methods and data analysis

Values of  $k_{\text{obs}}$  were measured as a function of temperature at different solvent viscosities, using a home-built nanosecond laser-pump spectrometer similar to that of Vaiana et al. (12). Briefly, samples were placed in a temperature-controlled Peltier stage (Cat. No. TLC50; Quantum Northwest, Liberty Lake, WA) and irradiated with a 7-ns pulse at 290 nm, generated by pumping a deuterium Raman cell with the fourth harmonic of a Nd:YAG laser (Continuum, San Jose, CA). The decay of the tryptophan triplet-state population was measured by time-resolved triplet-triplet absorption at 458 nm (argon ion laser; Coherent, Santa Clara, CA). Each trace was averaged over 256 laser pulses and five of these traces were acquired at each temperature, in a range from 5° to 50°C. Time-resolved absorption was detected using nanosecond photodetectors (New Focus; Newport, Irvine,

CA), and data were recorded by Cat. No. DPO3032 digital oscilloscopes (Tektronix, Beaverton, OR). After correcting for background, the temperature- and viscosity-dependent data for each set of buffer conditions were assembled into an array containing ~120 traces. To reduce the noise, singular-value decomposition was performed and the 12 largest components were used to reconstruct the data at each temperature (Fig. 3). We note that this procedure yielded the same rates as the ones obtained from averaging over individual traces at each temperature, but significantly reduced the noise and decreased the uncertainty in the fit (Figs. S4 and S5 and Table S1 in the Supporting Material). This array of data was then used as input for the global fitting procedure described in the following.

As in Vaiana et al. (12), each trace in the array (Fig. 3) was fit to an exponential relaxation (yielding the exponential relaxation rate  $k_{\text{obs}}$ ), with a time-independent offset and a second offset function that was constant for times  $< \sim 10^{-5}$  s and varied linearly with  $\log(t)$  for times longer than  $10^{-5}$  s (this empirically accounted for the observed slower decay due to a radical photoproduct (56)). When  $k_{\text{obs}}^{-1}$  data obtained from individual fits were plotted as a function of viscosity for each temperature, they followed a simple linear dependence. A first-order polynomial fit yields the intercept ( $1/k_R$ ) and the slope ( $1/\eta k_{D+}$ ) for each temperature (Fig. S3). To reduce the uncertainty in the values of  $k_R(T)$  and of  $k_{D+}(T)$ , we globally fit the array of viscosity and temperature-dependent data for each set of buffer conditions, according to the general function

$$\frac{1}{k_{\text{obs}}(\eta_T, T)} = \frac{1}{k_R(T)} + \frac{1}{k_{D+}(\eta_T, T)},$$

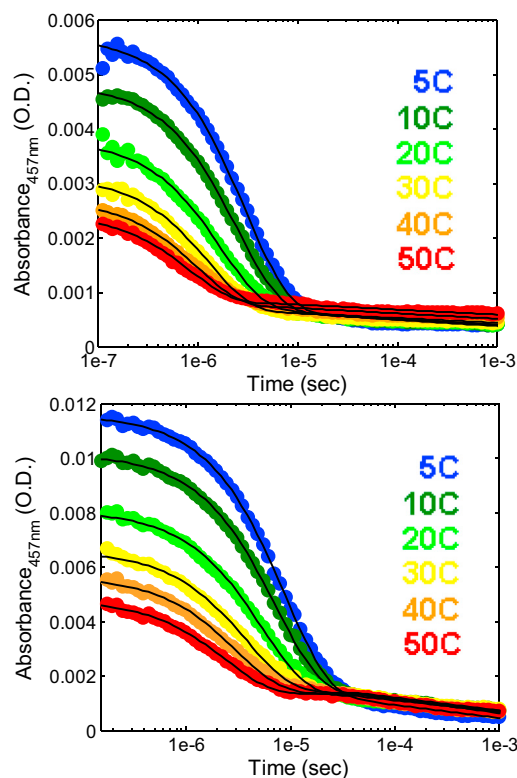

FIGURE 3 Decay of tryptophan triplet-triplet absorption measured after nanosecond excitation in solutions of CGRP (50 mM NaAc, pH 4.9) at different temperatures in aqueous buffer (*top*) and in 6 M GdmCl (*bottom*). (Solid lines) Fits to an exponential decay followed by a slower decay. The rate of initial exponential decay,  $k_{\text{obs}}(T)$ , corresponds to the quenching of the W37 triplet state by cystine (C2–C7) upon (end-to-end) contact formation. To see this figure in color, go online.

where we can separate the intrinsic temperature dependence of  $k_{D+}$  from its viscosity dependence, and write the latter as a general first-order polynomial:

$$k_{D+}(\eta_T, T) = f(\eta_T)k'_{D+}(T) = \eta_T^{-1}k'_{D+}(T).$$

Here  $T$  is temperature and  $\eta_T$  is the solution viscosity measured at the given temperature (Fig. S3). We note that this global fitting procedure differs from some of the previous methods used to fit TCQ data (56–59) in that it does not assume a fixed functional dependence of  $k_R$  and  $k_{D+}$  on temperature, and yields unbiased, model-free, temperature-dependent values of  $k_R(T)$  and  $k_{D+}(T)$ , while globally fitting the data and reducing the uncertainty in the fits. Plots of  $k_R(T)$  and  $\eta k_{D+}(T)$  obtained in this way exhibit an apparent Arrhenius dependence in the temperature range studied (see Figs. 7 and 9).

## Debye length calculation

Values of the Debye length  $\kappa^{-1}$  seen later in Fig. 6 were calculated at each salt concentration from

$$\kappa^{-1} = \sqrt{\frac{\epsilon_r \epsilon_o k_B T}{2N_A e^2 I}},$$

where  $\epsilon_r$  is the dielectric constant,  $\epsilon_o$  is the permittivity in free space,  $k_B$  is the Boltzmann constant,  $T$  is the temperature in Kelvin,  $N_A$  is Avogadro's number,  $e$  is the elementary charge, and  $I$  is the ionic strength of the solution in mole/m<sup>3</sup>.

Further details may be found in the Supporting Material.

## RESULTS AND DISCUSSION

### CGRP populates states with short end-to-end distances

For a direct comparison of contact formation rates in CGRP and IAPP, we labeled the peptide as in Vaiana et al. (12). Briefly, we mutated the C-terminal phenylalanine F37 of CGRP to tryptophan and used the native N-terminal disulfide bond between C2 and C7 as the quencher of the tryptophan triplet state (Fig. 1). We note that the F37W mutation represents a minimal perturbation to the sequence. Although F37 may be involved in direct interactions with the receptor, NMR experiments have shown that this residue does not affect CGRP's structure in solution (18) (comparison of CD spectra is also shown in Fig. S1). We monitored the decay of the tryptophan triplet-state population by measuring the time-resolved triplet-triplet absorption at 458 nm after nanosecond excitation at 290 nm. The raw data obtained for CGRP in 6 M GdmCl and in aqueous buffer (50 mM NaOAc, pH = 4.9) at various temperatures are shown in Fig. 3. As observed for IAPP, the data exhibit a fast exponential decay followed by a slowly decaying tail of much smaller amplitude (12). The fast exponential decay corresponds to the triplet-state decay due to contact with cystine, while the slower tail corresponds to the decay of a radical photoproduct (56). As described elsewhere, the exponential rate of triplet-state decay ( $k_{\text{obs}}$ ) depends on two contributions: 1) the probability of forming a trypto-

phan-cystine contact, through the equilibrium end-to-end distance distribution  $P(r)$  (a structural property of the peptide); and 2) the rate at which the backbone can reconfigure itself to allow the two ends to come into contact (the intrachain diffusional dynamics) (57,59). For simplicity, we will assume in the following that the differences in  $k_{\text{obs}}$  primarily reflect differences in  $P(r)$ . The analysis of the viscosity and temperature dependence of  $k_{\text{obs}}$  presented later confirms the validity of this assumption. This analysis will allow separating the reaction-limited rate  $k_R$ , which depends only on  $P(r)$ , from the diffusion-limited rate  $k_{D+}$ , which depends on intrachain diffusion (see Materials and Methods). This will provide additional information on the intrachain dynamics, which will be discussed in a separate paragraph. In the following, small values of  $k_{\text{obs}}$  indicate large end-to-end distances, while large values of  $k_{\text{obs}}$  indicate short end-to-end distances. In Fig. 4 we show the Arrhenius plots of  $k_{\text{obs}}(T)$  measured for CGRP in two different solvents (obtained from fitting the data of Fig. 3), compared to the values previously measured for hIAPP under identical solution conditions (12). The observed rates follow an empirical Arrhenius behavior in the temperature range studied, consistent with previous findings using this technique (12,59), with apparent activation energies of ~5 kcal/mol for all peptides/solvent conditions (respectively 5.0, 5.2, 5.7, and 5.2 kcal/mol for hIAPP and CGRP in buffer and for hIAPP and CGRP in 6 M GdmCl). Therefore, the relative changes in  $k_{\text{obs}}$  discussed in the following, as a function of peptide sequence or solvent conditions, occur consistently at all temperatures.

We first compare  $k_{\text{obs}}$  for the two peptides under highly denaturing conditions (6 M GdmCl). This is a convenient reference state for measuring basic polymer properties of peptides. In this good solvent, unfolded proteins and IDPs behave like wormlike chains with excluded volume (41,43,45,48,59–62). The small values of  $k_{\text{obs}}$  measured in

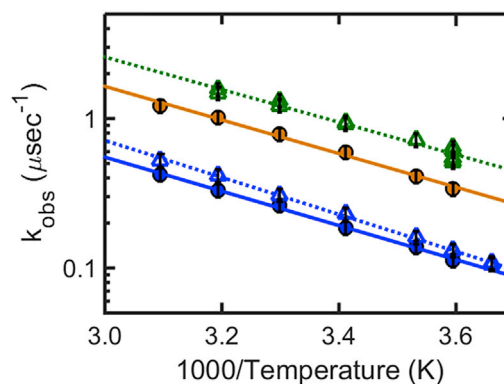

FIGURE 4 Observed rates,  $k_{\text{obs}}$ , measured for CGRP (circles) compared to those of hIAPP (triangles) from Vaiana et al. (12), in 6 M GdmCl (blue), and in aqueous buffer (orange, CGRP; green, hIAPP): 50 mM NaAc pH 4.9. Small values of  $k_{\text{obs}}$  indicate large end-to-end distances; large values of  $k_{\text{obs}}$  indicate short end-to-end distances. To see this figure in color, go online.

6 M GdmCl indicate that both peptides preferentially populate states with large end-to-end distances, consistent with expanded denatured states (59). The slightly smaller values observed for CGRP indicate that this peptide has a slightly larger end-to-end distance and therefore a slightly larger persistence length or excluded volume compared to hIAPP. This is consistent with CGRP's larger number of bulky (hydrophobic) side chains.

Next, we compare the values measured for the two peptides in aqueous buffer, in the same conditions used previously for hIAPP (50 mM NaAc buffer, pH = 4.9) (12). Fig. 4 shows that, at all temperatures,  $k_{\text{obs}}$  values for CGRP are ~3 times larger in buffer than in 6 M GdmCl (Table 1). CGRP therefore populates states with significantly shorter end-to-end distances in aqueous buffer with respect to those in denaturant (this is confirmed by the values of  $k_R$  presented later). A similar result was found by Vaiana et al. (12) for hIAPP and was attributed to intraprotein interactions occurring between the N\_loop (residues 1–7) and the backbone of the remaining disordered chain (residues 8–37), with the rigid structure of the N\_loop (21) acting as a nucleus. A similar increase in rates was observed for hIAPP, for the rat variant of IAPP (rIAPP), and for a model hydrophilic sequence that contains the N\_loop (residues 1–7) of IAPP. By contrast, a much smaller variation in rates (i.e., in the end-to-end distance) was observed when the disulfide bond of the N\_loop was reduced, thus opening the loop (12). The presence of nonlocal contacts between residues in the N\_loop and the rest of the linear chain is also supported by molecular simulations of the IAPP monomer in solution (63,64). Given that the N\_loop sequence of CGRP is almost identical to that of hIAPP (Fig. 1), a similar mechanism could also occur in CGRP.

Comparing the values of  $k_{\text{obs}}$  for the two peptides in aqueous buffer indicates that hIAPP has shorter end-to-end distances than CGRP (Fig. 4). Inspection of the sequences (Fig. 1) shows that CGRP is slightly more hydrophobic, and has a higher net charge than hIAPP at pH = 4.9 (the average hydrophobicity per residue is +0.21 and –0.097 on the Kyte and Doolittle scale (65), and the net charge is roughly +5 and +4 for CGRP and hIAPP, respectively, at this pH). Based on its larger hydrophobicity, CGRP would be expected to populate more compact states with respect to hIAPP in water, contrary to observations. On the other hand, the higher net charge of CGRP would cause greater

Coulomb repulsion, leading to larger end-to-end distances (44,46), consistent with our observations. We therefore set out to study whether the relatively small difference in net charge between hIAPP and CGRP (+4 and +5, respectively) could account for the observed differences.

### Electrostatic interactions modulate the end-to-end distance of CGRP

To investigate the effect of charge on the end-to-end distance of CGRP, we first measured  $k_{\text{obs}}(T)$  at different pH values. We found that the end-to-end distance of CGRP increases at decreasing pH (i.e., at increasing net charge), indicating that Coulomb repulsion causes significant expansion of CGRP in buffer. In the pH range 3–8, the net charge of CGRP decreases from roughly +6 to +4, due to two titrating side chains (assuming that the N-terminus remains fully protonated at pH = 8): the histidine H10, which has a measured pKa of 6.5 (16) and is positively charged at pH = 4.9; and the aspartic acid D3, which has an expected pKa of ~4 and is negatively charged at pH = 4.9. Fig. 5 shows plots of  $k_{\text{obs}}(T)$ , measured for CGRP at pH 3, 4.9, and 8 in buffer (corresponding to a peptide net charge of roughly +6, +5, and +4, respectively), and in denaturant (6 M GdmCl) for comparison. As in Fig. 4, larger values of  $k_{\text{obs}}$  indicate smaller end-to-end distances. At all temperatures, the observed rates increase monotonically as the net charge of CGRP decreases from +6 to +4, indicating that the peptide samples shorter end-to-end distances as the net charge decreases. This suggests that Coulomb repulsion in CGRP reduces the probability of sampling short end-to-end distances. To check whether the decrease in  $k_{\text{obs}}$  from pH 4.9 to pH 3 was truly due to the loss of charge on the aspartic acid and not to other possible direct effects of pH, we measured  $k_{\text{obs}}$  for a D3N CGRP mutant at pH 4.9. The results were virtually indistinguishable from those of wild-type CGRP at pH 3 (Fig. S2). Similar results were also obtained when comparing D3N at pH 8 with wild-type CGRP at pH 4.9, both corresponding to a net charge of ~+5 (Fig. S2). When 1 M KCl was added to the solution, the rates increased further, indicating that complete screening of charges by salt leads to a maximally compact state (Fig. 5).

To further test this, and to gain a more quantitative understanding of the electrostatic contribution to the free-energy

**TABLE 1** Measured rates at 20°C

| Peptide                                 | CGRP        |             |             |             | D3N         |             | IAPP <sup>a</sup> |             |
|-----------------------------------------|-------------|-------------|-------------|-------------|-------------|-------------|-------------------|-------------|
|                                         | 6 M GdmCl   | pH 3        | pH 4.9      | pH 8        | 6 M GdmCl   | pH 3        | 6 M GdmCl         | pH 4.9      |
| $k_{\text{obs}}$ ( $\mu\text{s}^{-1}$ ) | 0.19 ± 0.02 | 0.43 ± 0.04 | 0.57 ± 0.06 | 0.74 ± 0.07 | 0.18 ± 0.02 | 0.39 ± 0.04 | 0.23 ± 0.02       | 0.93 ± 0.07 |
| $k_R$ ( $\mu\text{s}^{-1}$ )            | 0.25 ± 0.03 | 0.58 ± 0.06 | 0.93 ± 0.09 | 1.3 ± 0.1   | 0.23 ± 0.02 | 0.56 ± 0.06 | 0.32 ± 0.03       | 1.2 ± 0.1   |
| $\eta k_D$ (cP $\mu\text{s}^{-1}$ )     | 1.2 ± 0.2   | 1.7 ± 0.3   | 1.6 ± 0.3   | 1.8 ± 0.4   | 1.3 ± 0.2   | 1.4 ± 0.3   | 1.3 ± 0.2         | 3.6 ± 0.6   |
| $k_D$ ( $\mu\text{s}^{-1}$ )            | 0.72 ± 0.14 | 1.7 ± 0.3   | 1.5 ± 0.3   | 1.7 ± 0.3   | 0.75 ± 0.15 | 1.3 ± 0.3   | 0.7 ± 0.1         | 3.6 ± 0.6   |

<sup>a</sup>IAPP values from Vaiana et al. (12).

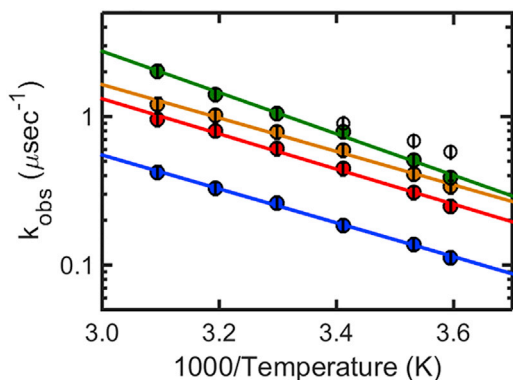

FIGURE 5 Observed rates  $k_{\text{obs}}$  for CGRP at different pH values: pH 3 (red) net charge +6, pH 4.9 (orange) net charge +5, pH 8 (green) net charge +4, and after addition of 1 M KCl (open black circles). 6 M GdmCl data are shown for comparison (blue). At all temperatures, the values of  $k_{\text{obs}}$  decrease (i.e., the end-to-end distance increases) monotonically as the net charge increases. To see this figure in color, go online.

cost of forming a van der Waals contact between the ends of the peptide, we measured  $k_{\text{obs}}$  as a function of salt concentration. At variance with the pH titrations (which only affect the charges of two specific side chains, D3 and H10), the salt is expected to screen all seven charges in CGRP, without significantly altering the distribution of charges along the chain (i.e., the charge patterning). Fig. 6 (inset) shows the relaxation times ( $1/k_{\text{obs}}$ ) of D3N CGRP measured as a function of KCl concentration, at pH 3 (these conditions were chosen to maximize the peptide net charge). Fig. 6 (inset) also shows the values of the Debye screening length,  $\kappa^{-1}$ . The observed correlation between the Debye length and the relaxation times (Fig. 6, inset) confirms that charge screening causes shorter end-to-end distances in CGRP at high salt concentrations. Interestingly, we find a linear dependence between  $\ln(k_{\text{obs}})$  and the Debye length,  $\kappa^{-1}$  (Fig. 6). This provides information on the electrostatic

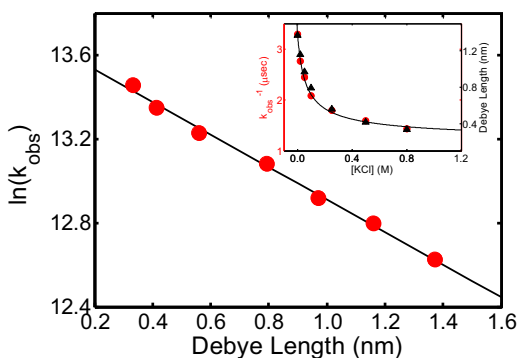

FIGURE 6 (Inset) Observed relaxation times  $k_{\text{obs}}^{-1}$  (red) measured for D3N CGRP at pH 3 at different concentrations of KCl, and corresponding Debye lengths  $\kappa^{-1}$  (black). A plot of  $\ln(k_{\text{obs}})$  versus the Debye length reveals an empirical linear dependence. (Best fit line)  $\ln(k_{\text{obs}}) = a\kappa^{-1} + b$  ( $a = 0.773 \text{ nm}^{-1}$ ,  $b = 13.68$ ). Data shown for  $10^\circ\text{C}$ . To see this figure in color, go online.

contribution to the free-energy cost of forming a contact between the two ends of the peptide. By analyzing the viscosity- and temperature-dependent behavior of  $k_{\text{obs}}$  at 0 M KCl and 500 mM KCl (see the Supporting Material and Fig. S3) we find that  $k_{\text{obs}}$  is proportional to  $k_R$ . Because quenching of tryptophan triplet state by cystine occurs when the two side chains are roughly within a distance of 0.4 nm (58), the reaction-limited rate  $k_R$  is proportional to the fraction of peptides with  $R_{\text{end-to-end}} < 0.4 \text{ nm}$  (i.e., the population of the contact subensemble) over the fraction of peptides with  $R_{\text{end-to-end}} > 0.4 \text{ nm}$  (i.e., the population of the open subensemble). The relative population of these two subensembles is directly related to their free-energy difference. The linear dependence of  $\ln(k_{\text{obs}})$  on  $\kappa^{-1}$  (Fig. 6) therefore implies that the free-energy difference between the two subensembles (i.e., the free-energy cost of forming a van der Waals contact) varies linearly with the Debye length.

Our data clearly show that the end-to-end distance of CGRP is modulated by electrostatic interactions between charged residues in the sequence: the peptide expands when the net charge increases. We note that previous far-ultraviolet CD measurements of CGRP in aqueous buffer showed no variation in secondary structure content as a function of pH, in the same pH range studied here (16). This data is also confirmed by our own CD measurements under the same solution conditions of Fig. 5 (Fig. S1). This behavior is at odds with that of natively folded proteins, for which local (secondary) and nonlocal (tertiary) structural properties are generally strongly coupled. However, it is not surprising in the case of IDPs, as they lack cooperative interactions. Secondary structure content in IDPs has in fact been shown to be uncorrelated with long-range structural properties such as the hydrodynamic radius (45). Our findings further underline the importance of measuring nonlocal (long-range) structural properties of IDPs (as the end-to-end distance or the radius of gyration), in addition to local properties.

## End-to-end distance and internal dynamics of CGRP

To separate the dynamical from the structural information contained in  $k_{\text{obs}}$ , we measured the rate of triplet-state decay ( $k_{\text{obs}}$ ) as a function of viscosity and temperature (Fig. S3). The data analysis described in Materials and Methods yields the reaction-limited rate,  $k_R(T)$ , and the diffusion-limited rate,  $k_{D+}(T)$  at each temperature. While  $k_R$  (Eq. 1) depends only on the equilibrium (structural) properties of CGRP (i.e., its end-to-end distance distribution,  $P(r)$ ),  $k_{D+}$  depends on both the structure ( $P(r)$ ), and the dynamics of the chain (intrachain diffusion). By providing both values of  $k_R$  and  $k_{D+}$  our experiments allow distinguishing whether large values of  $k_{D+}$  are due to the peptide's short end-to-end distance (i.e., to a high probability of forming a contact), or to

its fast conformational sampling (i.e., fast intrachain diffusion). We note that measurements of  $k_{D+}$  alone, obtained for example using a diffusion-limited technique, would not allow us to distinguish between these two scenarios. Arrhenius plots of  $k_R(T)$  and  $\eta(T)k_{D+}(T)$  (the diffusion-limited rate corrected for the viscosity value of the given solvent at each temperature,  $\eta(T)$ ) are shown in Fig. 7. The temperature dependence of  $k_R$  and of  $\eta(T)k_{D+}$  both follow an empirical Arrhenius dependence, with apparent activation energies that are consistent with those found by Buscaglia et al. (59) for model peptides of similar length (the apparent activation energies for  $k_R$  are 4.6, 4.0, 4.8 and 5.0 kcal/mol, and those for  $\eta k_{D+}$  are 4.6, 3.0, 3.4, 2.8 kcal/mol, respectively, in buffer at pH 8, 4.9, 3, and in 6 M GdmCl). As noted in Buscaglia et al. (59), the temperature dependence of  $k_R$  primarily reflects the temperature dependence of the quenching rate of tryptophan by free cystine  $q(r)$  (Eq. 1). The small variations observed in the activation energies of different peptides and different pH values, may reflect slight differences in the temperature dependence of  $P(r)$ . In the following, we focus on the relatively large differences observed between the measured rates at different pH and solvent conditions.

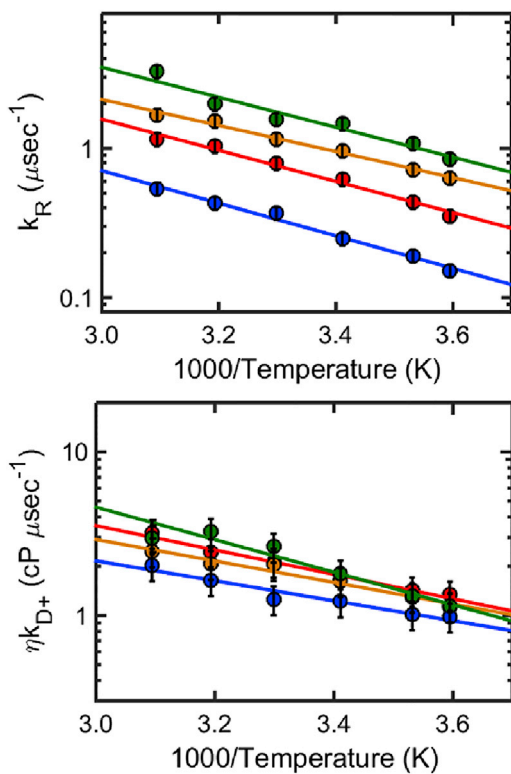

FIGURE 7 Reaction-limited rates  $k_R$  (top) and diffusion-limited rates corrected for viscosity  $\eta k_{D+}(T)$  (bottom) of CGRP in buffer at different pH values, and in 6 M GdmCl: pH 3 net charge +6 (red), pH 4.9 net charge +5 (orange), pH 8 net charge +4 (green), and 6 M GdmCl (blue). Large values of  $k_R$  indicate short end-to-end distances; large values of  $\eta k_{D+}$  can reflect short end-to-end distances or indicate fast intrachain dynamics. To see this figure in color, go online.

The reaction-limited rates  $k_R$  (Fig. 7, top) confirm the qualitative conclusions drawn in the previous paragraphs, namely that CGRP has a higher probability of sampling short end-to-end distances in aqueous buffer versus denaturant, and that this probability increases with increasing pH (i.e., with decreasing net charge). The corresponding end-to-end distance distributions,  $P(r)$ , calculated from  $k_R$  values at 20°C, using SSS theory (57) and assuming a simple Gaussian distribution (Eq. 1), are shown in Fig. 8. Under this assumption, the average end-to-end distance decreases from 3.7 nm in 6 M GdmCl, respectively, to 2.8, 2.4, and 2.1 nm at pH 3, 4.9, and 8 (these values are calculated assuming an initial value of 3.7 nm for the end-to-end distance of CGRP in 6 M GdmCl, consistent with data for a typical wormlike chain peptide of 31 residues long (59)). We note that if the actual  $P(r)$  differs from a simple Gaussian, the corresponding end-to-end distances can be recalculated for the specific distribution, using SSS theory and our measured  $k_R$  values from Eq. 1 (57).

The diffusion-limited rates (Fig. 7, bottom) give additional information on the dynamics of conformational sampling in CGRP. First we note that, unlike  $k_R$ , the values of  $\eta(T)k_{D+}$  barely change as a function of pH. The average time it takes to form an end-to-end contact ( $1/k_{D+}$ ) in fact remains roughly 0.6  $\mu$ s at 20°C at all pH values (Fig. 7, bottom, and Table 1). It is particularly informative to compare the rates in buffer and in denaturant (Table 1). While the values of  $k_R$  increase by a factor 5.2 between 6 M GdmCl and buffer (pH = 8), the corresponding values of  $\eta k_{D+}$  change by barely a factor 1.5. In other words, despite the fact that the end-to-end distance of CGRP is considerably shorter in aqueous solvent than in denaturant (Fig. 8), it takes almost the same time for the two ends of the peptide to form a contact. This implies that the end-to-end diffusional dynamics of CGRP is slower in aqueous solution than in denaturant.

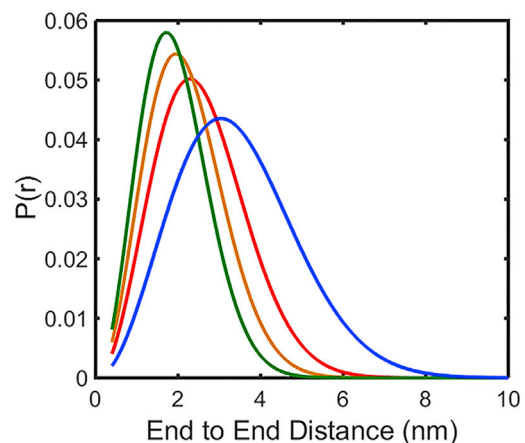

FIGURE 8 Estimate of the end-to-end distance distributions of CGRP in different solvents, calculated from experimental values of  $k_R$  at 20°C (Fig. 6, top) using SSS theory and assuming a Gaussian  $P(r)$  (Eq. 1). Color-coding as in Fig. 6. To see this figure in color, go online.

The observed slowing down of intrachain dynamics in water can be interpreted in terms of the appearance of many small barriers in the potential of mean force describing end-to-end distance diffusion (i.e., roughness in the energy landscape) (66,67). The appearance of a rougher energy landscape in water with respect to that in denaturant could be a direct consequence of the fact that the peptide samples more compact states (consistent with observations that diffusional dynamics slows down and internal friction of proteins increases as a function of compaction (40,47,49,50,68,69)) and/or could be due to the presence of intrachain interactions in water, which are specific to the CGRP sequence. As we shall see in the following paragraph, the slowing down of intrachain diffusion in water is unique to CGRP and is not observed in hIAPP, even though this peptide samples similarly compact states.

### Comparison between the end-to-end distance and the internal dynamics of CGRP and IAPP

We now compare more closely the end-to-end distance and the intrachain dynamics of CGRP and hIAPP in solution, taking into consideration the effect of net charge. Fig. 9 shows the values of  $k_R(T)$  and  $\eta(T)k_{D+}(T)$ , measured for CGRP (circles) and hIAPP (triangles) (12) in denaturant (blue) and in aqueous buffer at two different pH values. The data points in buffer are color-coded according to the peptide's net charge (net charge +5: orange; net charge +4: green). The values of  $k_R$  (Fig. 9, top) confirm our initial conclusions, namely that both peptides sample significantly shorter end-to-end distances in aqueous buffer with respect to those in denaturant. Specifically,  $k_R$  increases by a factor 5.2 for CGRP in buffer (pH 8) relative to denaturant, and by a factor 3.8 for hIAPP (Table 1), corresponding to a factor 1.8 (44%) and 1.6 (36%) decrease in the average end-to-end distance of the two peptides, respectively (assuming a simple Gaussian  $P(r)$  as in Fig. 8). We now directly compare the values of  $k_R$  measured for the two peptides in buffer. The data confirm that at pH 4.9, CGRP samples larger end-to-end distances compared to hIAPP. This is consistent with CGRP's larger net charge causing greater Coulomb repulsion (the net charge is, respectively, +5 and +4 for CGRP and hIAPP). Consistent with this interpretation, the  $k_R$  values of the two peptides become virtually undistinguishable when the net charge is the same (green data points: +4 for both peptides, i.e., pH 4.9 for hIAPP and pH 8 for CGRP). Under these conditions, it is now possible to compare the intrachain dynamics of CGRP and hIAPP in aqueous solution by directly comparing their diffusion-limited rates (Fig. 9, bottom, green data points). Strikingly, we find that even though hIAPP and CGRP have the same reaction-limited rates  $k_R$  (i.e., the same probability of forming a contact), the two peptides have significantly different diffusion-limited rates,  $\eta k_{D+}(T)$ . The values in Table 1 show that at 20°C it takes an average

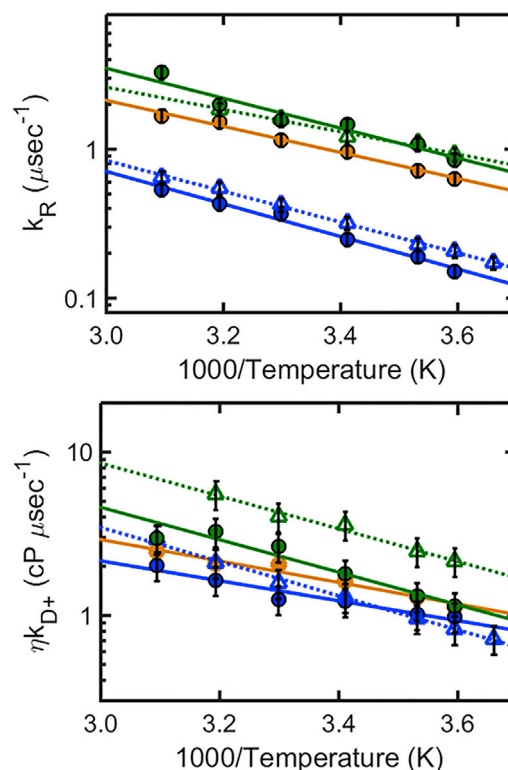

FIGURE 9 Reaction-limited rates  $k_R$  (top) and diffusion-limited rates corrected for viscosity  $\eta k_{D+}(T)$  (bottom) of CGRP (circles), compared to hIAPP (triangles) from Vaiana et al. (12), in denaturant (blue, 6 M GdmCl) and in aqueous buffer (green and orange). Color-coding indicates the peptide's net charge: net charge +4 (green) (CGRP pH 8, hIAPP pH 4.9); net charge +5 (orange) (CGRP pH 4.9); and 6 M GdmCl is shown for reference (blue). Large values of  $k_R$  indicate short end-to-end distances; large values of  $\eta k_{D+}$  can reflect short end-to-end distances or indicate fast intrachain dynamics. To see this figure in color, go online.

time ( $1/k_{D+}$ ) of 0.6  $\mu$ s to form an end-to-end contact in CGRP, but only 0.3  $\mu$ s in hIAPP. This data clearly show that in aqueous buffer CGRP has slower intrachain diffusional dynamics than hIAPP. By contrast, we do not observe any difference in the diffusional dynamics of CGRP and hIAPP in denaturant, where the peptides are both maximally expanded (blue data points).

If we interpret the slowing down of diffusional dynamics in terms of roughness in the end-to-end distance potential of mean force, our data implies that CGRP has a rougher energy landscape compared to hIAPP, in water, but not in denaturant. This, together with the observation that our peptides are highly compact in water and maximally expanded in denaturant, is in agreement with the observation that the roughness in the energy landscape and internal friction tend to increase as a function of IDP compaction (40,47,49,50,68,69). A number of factors have been proposed to contribute to rough energy landscapes or increased internal friction in IDPs and unfolded states of proteins. These include intrachain collisions, concerted dihedral angle rotations, and the occurrence of salt bridges, hydrogen



bonds, hydrophobic interactions, and other specific intrachain interactions (38,42,52,54,70–72). As the probability for collisions increases and short-range interactions become more significant when the protein samples more compact states, the protein dynamics is expected to slow down. Interestingly, data in Fig. 9 show that, while hIAPP is as compact as CGRP in aqueous buffer, its intrachain dynamics does not slow down relative to GdmCl, as instead we observe in CGRP. As noted in Vaiana et al. (12), the reaction- and diffusion-limited rates of hIAPP (corrected for viscosity) increase by the same proportionality constant in water relative to denaturant, as expected from SSS theory when the end-to-end distance decreases without affecting the intrachain diffusion coefficient (assuming a Gaussian  $P(r)$ ). We note that while different models can be used to quantitatively describe the dynamics of intrachain diffusion, each potentially leading to a different dependence of  $k_{D+}$  on the end-to-end distance (52), this will not change our basic conclusion. The data in Fig. 9 imply that in water, the roughness in CGRP's energy landscape arises from interactions specific to CGRP's sequence, interactions which are absent in hIAPP.

## CONCLUSIONS

The structural and dynamical properties of IDPs in their unbound disordered state can affect both the affinity and rate of binding to receptors and to drugs. By measuring the rate of end-to-end contact formation in CGRP under near-native conditions (in aqueous solution and in the absence of structure-inducing solvents), we find that the peptide samples highly compact conformations, characterized by short end-to-end distances. At variance with previous reports on the (local) secondary structure of CGRP (16), we find that its end-to-end distance (a nonlocal property) is extremely sensitive to pH and salt concentration. Lowering the solution pH from 8 to 4.9 and to 3, or decreasing the salt concentration, causes expansion of the peptide, due to increased electrostatic repulsion between charged residues in the sequence. These findings could be relevant to current theories on migraine pathology, which suggest an important role of pH in the generation of headache pain (73–76). It is known that CGRP can be released at pH below 7.5. A decrease in extracellular pH from basal levels (7.5) to values below pH 5.5 has been shown to stimulate the release of CGRP from trigeminal neurons, and has been implicated in triggering migraines (74,77,78). Our data show that variations in pH in this same range can significantly affect the ensemble of conformations sampled by CGRP.

By comparing our data to previous data on IAPP (12), we find that both CGRP and IAPP populate conformations with short end-to-end distances in water, yet their dynamics differs significantly. The dynamics of end-to-end contact formation of CGRP is in fact two-times slower than that of IAPP. Moreover, we find that intrachain diffusion of

CGRP (adjusted for viscosity) dramatically slows down in water (where the peptide is compact), versus denaturant (where the peptide is maximally expanded), an effect that is not observed in IAPP. We interpret this slowing down of diffusional dynamics in terms of increased roughness in the energy landscape of CGRP in water with respect to that in denaturant. This is consistent with the finding that intrachain dynamics slows down and internal friction increases when IDPs or unfolded states of proteins sample more compact conformations (40,47,49,50,68,69). However, because this effect was not observed in IAPP (12), the roughness in CGRP's energy landscape must arise from intrachain interactions and/or interactions between the chain and the solvent, which are specific to CGRP's sequence, and are absent in IAPP. Slow intrachain diffusion in CGRP could play a functional role in CGRP-receptor binding and activation. The specific interactions and molecular mechanisms giving rise to such roughness in CGRP remain to be investigated.

## SUPPORTING MATERIAL

Supporting Materials and Methods, five figures, and one table are available at [http://www.biophysj.org/biophysj/supplemental/S0006-3495\(15\)00729-8](http://www.biophysj.org/biophysj/supplemental/S0006-3495(15)00729-8).

## AUTHOR CONTRIBUTIONS

S.M.S. carried out peptide characterization, performed experiments and data analysis, and contributed to writing the article. S.M.C. measured viscosities and assisted in sample characterization, experiments, and analysis. A.R. and G.G. designed peptide synthesis and purification protocols; A.R. carried out the synthesis and assisted in peptide characterization. G.G. contributed writing and editing to the final article. S.M.V. conceived and designed the project, analyzed the results, and wrote the article with S.M.S. and G.G.

## ACKNOWLEDGMENTS

We are grateful to Alejandro Solis for his assistance with TCQ instrumentation, and to S. Banu Ozkan, Oliver Beckstein, and Dmitry Matyushov for insightful discussions. We gratefully acknowledge the use of facilities in the Proteomics Facility at Arizona State University.

This work was supported by Arizona State University start-up funds to S.M.V. and College of Liberal Arts and Sciences/Arizona State University grant award.

## REFERENCES

- Rosenfeld, M. G., J. J. Mermod, ..., R. M. Evans. 1983. Production of a novel neuropeptide encoded by the calcitonin gene via tissue-specific RNA processing. *Nature*. 304:129–135.
- Brain, S. D., T. J. Williams, ..., I. MacIntyre. 1985. Calcitonin gene-related peptide is a potent vasodilator. *Nature*. 313:54–56.
- Olesen, J., H. C. Diener, ..., L. M. Lesko. 2004. Calcitonin gene-related peptide receptor antagonist BIBN 4096 BS for the acute treatment of migraine. *N. Engl. J. Med.* 350:1104–1110.
- Russo, A. F. 2015. Calcitonin gene-related peptide (CGRP): a new target for migraine. *Annu. Rev. Pharmacol. Toxicol.* 55:533–552.

5. Wimalawansa, S. J. 1997. Amylin, calcitonin gene-related peptide, calcitonin, and adrenomedullin: a peptide superfamily. *Crit. Rev. Neurobiol.* 11:167–239.
6. Westermark, P., C. Wernstedt, ..., K. Sletten. 1986. A novel peptide in the calcitonin gene related peptide family as an amyloid fibril protein in the endocrine pancreas. *Biochem. Biophys. Res. Commun.* 140:827–831.
7. van Rossum, D., U. K. Hanisch, and R. Quirion. 1997. Neuroanatomical localization, pharmacological characterization, and functions of CGRP, related peptides, and their receptors. *Neurosci. Biobehav. Rev.* 21:649–678.
8. Watkins, H. A., D. L. Rathbone, ..., D. R. Poyner. 2013. Structure-activity relationships for  $\alpha$ -calcitonin gene-related peptide. *Br. J. Pharmacol.* 170:1308–1322.
9. Kayed, R., J. Bernhagen, ..., A. Kapurniotu. 1999. Conformational transitions of islet amyloid polypeptide (IAPP) in amyloid formation in vitro. *J. Mol. Biol.* 287:781–796.
10. Williamson, J. A., and A. D. Miranker. 2007. Direct detection of transient  $\alpha$ -helical states in islet amyloid polypeptide. *Protein Sci.* 16:110–117.
11. Yonemoto, I. T., G. J. A. Kroon, ..., J. W. Kelly. 2008. Amylin propeptide processing generates progressively more amyloidogenic peptides that initially sample the helical state. *Biochemistry.* 47:9900–9910.
12. Vaiana, S. M., R. B. Best, ..., J. Hofrichter. 2009. Evidence for a partially structured state of the amylin monomer. *Biophys. J.* 97:2948–2957.
13. Soong, R., J. R. Brender, ..., A. Ramamoorthy. 2009. Association of highly compact type II diabetes related islet amyloid polypeptide intermediate species at physiological temperature revealed by diffusion NMR spectroscopy. *J. Am. Chem. Soc.* 131:7079–7085.
14. Wei, L., P. Jiang, ..., K. Pervushin. 2009. Residual structure in islet amyloid polypeptide mediates its interactions with soluble insulin. *Biochemistry.* 48:2368–2376.
15. Manning, M. C. 1989. Conformation of the  $\alpha$ -form of human calcitonin gene-related peptide (CGRP) in aqueous solution as determined by circular dichroism spectroscopy. *Biochem. Biophys. Res. Commun.* 160:388–392.
16. Hubbard, J. A., S. R. Martin, ..., N. C. Price. 1991. Solution structures of calcitonin-gene-related-peptide analogues of calcitonin-gene-related peptide and amylin. *Biochem. J.* 275:785–788.
17. Mimeault, M., S. St. Pierre, and A. Fournier. 1993. Conformational characterization by circular-dichroism spectroscopy of various fragments and analogs of calcitonin-gene-related peptide. *Eur. J. Biochem.* 213:927–934.
18. O’Connell, J. P., S. M. Kelly, ..., B. J. Smith. 1993. On the role of the C-terminus of alpha-calcitonin-gene-related peptide ( $\alpha$ CGRP). The structure of des-phenylalaninamide 37- $\alpha$ CGRP and its interaction with the CGRP receptor. *Biochem. J.* 291:205–210.
19. Breeze, A. L., T. S. Harvey, ..., I. D. Campbell. 1991. Solution structure of human calcitonin gene-related peptide by  $^1\text{H}$  NMR and distance geometry with restrained molecular dynamics. *Biochemistry.* 30:575–582.
20. Boulanger, Y., A. Khiat, ..., A. Fournier. 1995. Structure of human calcitonin gene-related peptide (hCGRP) and of its antagonist hCGRP 8–37 as determined by NMR and molecular modeling. *Pept. Res.* 8:206–213.
21. Cope, S. M., S. Shinde, ..., S. M. Vaiana. 2013. Cyclic N-terminal loop of amylin forms nonamyloid fibers. *Biophys. J.* 105:1661–1669.
22. Chiba, T., A. Yamaguchi, ..., T. Fujita. 1989. Calcitonin gene-related peptide receptor antagonist human CGRP-(8–37). *Am. J. Physiol.* 256:E331–E335.
23. Tippins, J. R., V. Di Marzo, ..., I. MacIntyre. 1986. Investigation of the structure/activity relationship of human calcitonin gene-related peptide (CGRP). *Biochem. Biophys. Res. Commun.* 134:1306–1311.
24. Roberts, A. N., B. Leighton, ..., E. A. Foot. 1989. Molecular and functional characterization of amylin, a peptide associated with type 2 diabetes mellitus. *Proc. Natl. Acad. Sci. USA.* 86:9662–9666.
25. Lynch, B., and E. T. Kaiser. 1988. Biological properties of two models of calcitonin gene related peptide with idealized amphiphilic  $\alpha$ -helices of different lengths. *Biochemistry.* 27:7600–7607.
26. Jayasinghe, S. A., and R. Langen. 2007. Membrane interaction of islet amyloid polypeptide. *Biochim. Biophys. Acta.* 1768:2002–2009.
27. Williamson, J. A., J. P. Loria, and A. D. Miranker. 2009. Helix stabilization precedes aqueous and bilayer-catalyzed fiber formation in islet amyloid polypeptide. *J. Mol. Biol.* 393:383–396.
28. Nanga, R. P. R., J. R. Brender, ..., A. Ramamoorthy. 2008. Structures of rat and human islet amyloid polypeptide IAPP(1–19) in micelles by NMR spectroscopy. *Biochemistry.* 47:12689–12697.
29. Nanga, R. P. R., J. R. Brender, ..., A. Ramamoorthy. 2009. Three-dimensional structure and orientation of rat islet amyloid polypeptide protein in a membrane environment by solution NMR spectroscopy. *J. Am. Chem. Soc.* 131:8252–8261.
30. Tompa, P. 2005. The interplay between structure and function in intrinsically unstructured proteins. *FEBS Lett.* 579:3346–3354.
31. Gunasekaran, K., C. J. Tsai, ..., R. Nussinov. 2003. Extended disordered proteins: targeting function with less scaffold. *Trends Biochem. Sci.* 28:81–85.
32. Shoemaker, B. A., J. J. Portman, and P. G. Wolynes. 2000. Speeding molecular recognition by using the folding funnel: the fly-casting mechanism. *Proc. Natl. Acad. Sci. USA.* 97:8868–8873.
33. Huang, Y., and Z. Liu. 2009. Kinetic advantage of intrinsically disordered proteins in coupled folding-binding process: a critical assessment of the “fly-casting” mechanism. *J. Mol. Biol.* 393:1143–1159.
34. Wright, P. E., and H. J. Dyson. 2009. Linking folding and binding. *Curr. Opin. Struct. Biol.* 19:31–38.
35. Turjanski, A. G., J. S. Gutkind, ..., G. Hummer. 2008. Binding-induced folding of a natively unstructured transcription factor. *PLOS Comput. Biol.* 4:e1000060.
36. Wang, J., Y. Wang, ..., E. Wang. 2011. Multi-scaled explorations of binding-induced folding of intrinsically disordered protein inhibitor IA3 to its target enzyme. *PLOS Comput. Biol.* 7:e1001118.
37. Zhou, H. X. 2012. Intrinsic disorder: signaling via highly specific but short-lived association. *Trends Biochem. Sci.* 37:43–48.
38. Ansari, A., C. M. Jones, ..., W. A. Eaton. 1992. The role of solvent viscosity in the dynamics of protein conformational changes. *Science.* 256:1796–1798.
39. Zhou, H. X. 2004. Polymer models of protein stability, folding, and interactions. *Biochemistry.* 43:2141–2154.
40. Möglich, A., K. Joder, and T. Kiefhaber. 2006. End-to-end distance distributions and intrachain diffusion constants in unfolded polypeptide chains indicate intramolecular hydrogen bond formation. *Proc. Natl. Acad. Sci. USA.* 103:12394–12399.
41. Merchant, K. A., R. B. Best, ..., W. A. Eaton. 2007. Characterizing the unfolded states of proteins using single-molecule FRET spectroscopy and molecular simulations. *Proc. Natl. Acad. Sci. USA.* 104:1528–1533.
42. Liu, F., M. Nakaema, and M. Gruebele. 2009. The transition state transit time of WW domain folding is controlled by energy landscape roughness. *J. Chem. Phys.* 131:195101.
43. Ziv, G., D. Thirumalai, and G. Haran. 2009. Collapse transition in proteins. *Phys. Chem. Chem. Phys.* 11:83–93.
44. Müller-Späh, S., A. Soranno, ..., B. Schuler. 2010. Charge interactions can dominate the dimensions of intrinsically disordered proteins. *Proc. Natl. Acad. Sci. USA.* 107:14609–14614.
45. Marsh, J. A., and J. D. Forman-Kay. 2010. Sequence determinants of compaction in intrinsically disordered proteins. *Biophys. J.* 98:2383–2390.

46. Mao, A. H., S. L. Crick, ..., R. V. Pappu. 2010. Net charge per residue modulates conformational ensembles of intrinsically disordered proteins. *Proc. Natl. Acad. Sci. USA*. 107:8183–8188.
47. Waldauer, S. A., O. Bakajin, and L. J. Lapidus. 2010. Extremely slow intramolecular diffusion in unfolded protein L. *Proc. Natl. Acad. Sci. USA*. 107:13713–13717.
48. Hofmann, H., A. Soranno, ..., B. Schuler. 2012. Polymer scaling laws of unfolded and intrinsically disordered proteins quantified with single-molecule spectroscopy. *Proc. Natl. Acad. Sci. USA*. 109:16155–16160.
49. Soranno, A., B. Buchli, ..., B. Schuler. 2012. Quantifying internal friction in unfolded and intrinsically disordered proteins with single-molecule spectroscopy. *Proc. Natl. Acad. Sci. USA*. 109:17800–17806.
50. Ahmad, B., Y. Chen, and L. J. Lapidus. 2012. Aggregation of  $\alpha$ -synuclein is kinetically controlled by intramolecular diffusion. *Proc. Natl. Acad. Sci. USA*. 109:2336–2341.
51. Das, R. K., and R. V. Pappu. 2013. Conformations of intrinsically disordered proteins are influenced by linear sequence distributions of oppositely charged residues. *Proc. Natl. Acad. Sci. USA*. 110:13392–13397.
52. Cheng, R. R., A. T. Hawk, and D. E. Makarov. 2013. Exploring the role of internal friction in the dynamics of unfolded proteins using simple polymer models. *J. Chem. Phys.* 138:074112.
53. Wuttke, R., H. Hofmann, ..., B. Schuler. 2014. Temperature-dependent solvation modulates the dimensions of disordered proteins. *Proc. Natl. Acad. Sci. USA*. 111:5213–5218.
54. Echeverria, I., D. E. Makarov, and G. A. Papoian. 2014. Concerted dihedral rotations give rise to internal friction in unfolded proteins. *J. Am. Chem. Soc.* 136:8708–8713.
55. Holehouse, A. S., K. Garai, ..., R. V. Pappu. 2015. Quantitative assessments of the distinct contributions of polypeptide backbone amides versus side chain groups to chain expansion via chemical denaturation. *J. Am. Chem. Soc.* 137:2984–2995.
56. Lapidus, L. J., W. A. Eaton, and J. Hofrichter. 2000. Measuring the rate of intramolecular contact formation in polypeptides. *Proc. Natl. Acad. Sci. USA*. 97:7220–7225.
57. Lapidus, L. J., P. J. Steinbach, ..., J. Hofrichter. 2002. Effects of chain stiffness on the dynamics of loop formation in polypeptides. Appendix: testing a 1-dimensional diffusion model for peptide dynamics. *J. Phys. Chem. B*. 106:11628–11640.
58. Lapidus, L. J., W. A. Eaton, and J. Hofrichter. 2001. Dynamics of intramolecular contact formation in polypeptides: distance dependence of quenching rates in a room-temperature glass. *Phys. Rev. Lett.* 87:258101.
59. Buscaglia, M., L. J. Lapidus, ..., J. Hofrichter. 2006. Effects of denaturants on the dynamics of loop formation in polypeptides. *Biophys. J.* 91:276–288.
60. Tanford, C. 1968. Protein denaturation. *Adv. Protein Chem.* 23:121–282.
61. Wilkins, D. K., S. B. Grimshaw, ..., L. J. Smith. 1999. Hydrodynamic radii of native and denatured proteins measured by pulse field gradient NMR techniques. *Biochemistry*. 38:16424–16431.
62. Kohn, J. E., I. S. Millett, ..., K. W. Plaxco. 2004. Random-coil behavior and the dimensions of chemically unfolded proteins. *Proc. Natl. Acad. Sci. USA*. 101:12491–12496.
63. Miller, C., G. H. Zerze, and J. Mittal. 2013. Molecular simulations indicate marked differences in the structure of amylin mutants, correlated with known aggregation propensity. *J. Phys. Chem. B*. 117:16066–16075.
64. Zerze, G. H., C. Miller, and J. Mittal. 2014. Correlation of helical propensity in amylin sequences with known aggregation propensity. *Biophys. J.* 106:483a.
65. Kyte, J., and R. F. Doolittle. 1982. A simple method for displaying the hydrophobic character of a protein. *J. Mol. Biol.* 157:105–132.
66. Portman, J. J., S. Takada, and P. G. Wolynes. 2001. Microscopic theory of protein folding rates. II. Local reaction coordinates and chain dynamics. *J. Chem. Phys.* 114:5082–5096.
67. Zwanzig, R. 1988. Diffusion in a rough potential. *Proc. Natl. Acad. Sci. USA*. 85:2029–2030.
68. Pabit, S. A., H. Roder, and S. J. Hagen. 2004. Internal friction controls the speed of protein folding from a compact configuration. *Biochemistry*. 43:12532–12538.
69. Nettels, D., I. V. Gopich, ..., B. Schuler. 2007. Ultrafast dynamics of protein collapse from single-molecule photon statistics. *Proc. Natl. Acad. Sci. USA*. 104:2655–2660.
70. Best, R. B., and G. Hummer. 2006. Diffusive model of protein folding dynamics with Kramers turnover in rate. *Phys. Rev. Lett.* 96:228104.
71. Hagen, S. J. 2010. Solvent viscosity and friction in protein folding dynamics. *Curr. Protein Pept. Sci.* 11:385–395.
72. Wensley, B. G., S. Batey, ..., J. Clarke. 2010. Experimental evidence for a frustrated energy landscape in a three-helix-bundle protein family. *Nature*. 463:685–688.
73. Durham, P. L., and C. G. Masterson. 2013. Two mechanisms involved in trigeminal CGRP release: implications for migraine treatment. *Headache*. 53:67–80.
74. Vause, C., E. Bowen, ..., P. Durham. 2007. Effect of carbon dioxide on calcitonin gene-related peptide secretion from trigeminal neurons. *Headache*. 47:1385–1397.
75. Bolay, H., and M. A. Moskowitz. 2002. Mechanisms of pain modulation in chronic syndromes. *Neurology*. 59:S2–S7.
76. Pietrobon, D. 2005. Migraine: new molecular mechanisms. *Neuroscientist*. 11:373–386.
77. Geppetti, P., E. Del Bianco, ..., M. Tramontana. 1991. Low pH-induced release of calcitonin gene-related peptide from capsaicin-sensitive sensory nerves: mechanism of action and biological response. *Neuroscience*. 41:295–301.
78. Del Bianco, E., P. Santicoli, ..., P. Geppetti. 1991. Different pathways by which extracellular  $Ca^{2+}$  promotes calcitonin gene-related peptide release from central terminals of capsaicin-sensitive afferents of guinea pigs: effect of capsaicin, high  $K^+$  and low pH media. *Brain Res.* 566:46–53.

# Supporting Information

## Slow internal dynamics and charge expansion in the disordered protein CGRP: a comparison with amylin

Sara M. Sizemore,<sup>§¶</sup> Stephanie M. Cope,<sup>§¶</sup> Anindiya Roy,<sup>‡</sup> Giovanna Ghirlanda<sup>‡</sup> and Sara M. Vaiana<sup>§¶</sup>  
§Center for Biological Physics, ¶Department of Physics, ‡Department of Chemistry and Biochemistry,  
Arizona State University, Tempe 85287, USA

### MATERIALS AND METHODS

**Materials.** Fmoc(9-fluorenylmethoxycarbonyl)-protected amino acids were purchased from Novabiochem. HOBt (N-hydroxybenzotriazole) and HBTU (O-Benzotriazole-N, N, N', N'-tetramethyl-uronium-hexafluoro-phosphate) were purchased from Genscript. N,N-diisopropylethylamine, or Hünig's base (DIPEA), and N-Methyl-2-pyrrolidone (NMP), used as base in solid phase peptide synthesis, were purchased from Sigma Aldrich. Piperidine (Sigma-Aldrich) was used for deprotection. Rink Amide ChemMatrix® was purchased from Matrix Innovations. Dimethyl formamide (DMF), Dichloromethane (DCM) and Acetonitrile were purchased from Fisher Scientific and were used without further purification.

In addition, >95% purity CGRP wild-type and CGRP D3N mutants, both with the F37W mutation, were purchased from Genscript and purity verified via HPLC on a C18 analytical column. Circular dichroism and TCQ measurements on CGRP F37W purchased from Genscript was identical to measurements on CGRP F37W that was synthesized and purified as described below, and show no difference in secondary or tertiary structure between the two sources.

**Peptide synthesis and purification.** CGRP F37W was synthesized on a 0.1 mmol scale using a CEM Liberty Automated Microwave Peptide Synthesizer and PALChem Matrix resin. After synthesis, the peptide was thoroughly washed four times by DMF followed by DCM. After washing, the peptide was stored on the resin at -20°C. For deprotection, the peptide was shaken for one hour in 20% piperidine, 0.1M HOBt in DMF and then washed three times. The cleavage cocktail consisted of 81.5% trifluoroacetic acid (TFA) + 5% Water +5% Anisole + 5% Thioanisole + 2.5% 1,2-Ethanedithiol (EDT) + 1% triisopropylsilane (TIS) at the ratio of 150 µL/ 10 mgs of resin. CGRP F37W was purified using Reverse Phase High performance liquid chromatography (HPLC) on a Waters 600E system. Crude peptide was purified on a C4 semi-preparative column (Vydac/Grace Deerfield, IL) from 5-50% Acetonitrile with 0.1% (v/v) TFA at a gradient of 1% every three minutes.

**Disulfide formation and oxidized peptide purification.** 1.0 mM of lyophilized peptide was dissolved in 30% DMSO and 3% Acetic Acid. The sample was stirred with a magnetic stir bar at 800 rpm. During this time, the formation of the intra-molecular disulfide bonds was monitored via HPLC on a C18 analytical column. The reaction was deemed complete when the reduced peptide's HPLC peak was no longer apparent: approximately 12 hours. After this time, the sample was frozen and lyophilized. Oxidized peptide was re-purified on a C18 semi-preparative column to further purify and separate any un-reacted peptide.

Calibrated MALDI-TOF mass spectrometry indicated the presence of a -2 Da species (above the margin of error the instrument), corresponding to the oxidized form of the peptide. To further support these findings, a maleimide sulfhydryl reaction was performed. 1 mg 3-(N-

Maleimidopropionyl)-biocytin (Cayman Chemical Company Ann Arbor, MI) was dissolved in 180 $\mu$ L 20mM PBS buffer, pH=7.0 and 20 $\mu$ L acetonitrile. Approximately 0.1mg pure, oxidized CGRP F37W was dissolved in 90 $\mu$ L 20mM PBS buffer, pH=7.0 and 10 $\mu$ L acetonitrile, and 50  $\mu$ L of this solution was combined with the 3-(N-Maleimidopropionyl)-biocytin solution and shaken for four hours. At 1 hour increments, 50  $\mu$ L aliquots were removed and frozen in dry ice. After four hours, the four aliquots were analyzed via MALDI-TOF MS.

HPLC peaks were analyzed by a Voyager Systems 4320 (Applied Biosystems) matrix assisted laser desorption/ionization-time of flight mass spectrometer (MALDI-TOF MS). The peak corresponding to a molecular weight of 3828Da (corresponding to the amidated and oxidized form of CGRP F37W) was analyzed further for purity by analytical HPLC, using a reverse phase C18 analytical column 214TP54 (Length 250mm  $\times$  ID 4.6mm) particle size 5 $\mu$ m using the same gradient conditions with 0.9 mL/min flow rate. A single peak eluting at a gradient corresponding to the hydrophobicity of CGRP was collected, immediately frozen in liquid nitrogen, lyophilized, and kept at -20°C.

**Circular dichroism measurements.** CD Spectra of the samples were measured in 1mm quartz cuvettes (Starna Cells). Aliquots of solutions prepared for TCQ were diluted with Millipore H<sub>2</sub>O, resulting in final peptide concentrations ranging from 10-40  $\mu$ M. A Jasco J-710 spectropolarimeter (Jasco Company) was used with a 1 nm bandwidth. For each sample, eight spectra taken with a 0.2 nm pitch at a 50 nm/min scan speed were averaged. Before data analysis, spectra were buffer subtracted.

**Salt dependence of  $k_{obs}$  and  $k_R$  for CGRP.** In the discussion of Figure 5 (salt dependence of  $k_{obs}$  for D3N CGRP at pH 3), it is assumed that  $k_{obs} \propto k_R$ , so that any variation in  $k_{obs}$  directly reflects a variation in the end-to-end distance distribution rather than in the diffusional dynamics. To test this, we measured the viscosity and temperature dependence of  $k_{obs}$  at two extreme salt concentrations, 0M and 500mM KCl (Figure S3 bottom two panels) and directly compared the values of  $k_R$  with those of  $k_{obs}$ . The values of  $k_R$ , obtained from the global fit results of Figure S3 (as described in Methods) are shown in the table below. We find that the values measured under the two extreme salt concentrations remain proportional, with a proportionality constant A given by:

$$A = \frac{k_{obs}}{k_R} \quad (1)$$

| <b>Rate</b>                 | <b>0M KCl</b>                    | <b>500mM KCl</b>                 |
|-----------------------------|----------------------------------|----------------------------------|
| <b><math>k_{obs}</math></b> | $0.30 \pm 0.03 \mu\text{s}^{-1}$ | $0.63 \pm 0.06 \mu\text{s}^{-1}$ |
| <b><math>k_R</math></b>     | $0.43 \pm 0.04 \mu\text{s}^{-1}$ | $0.88 \pm 0.09 \mu\text{s}^{-1}$ |
| <b>A</b>                    | $0.708 \pm 0.097$                | $0.717 \pm 0.100$                |

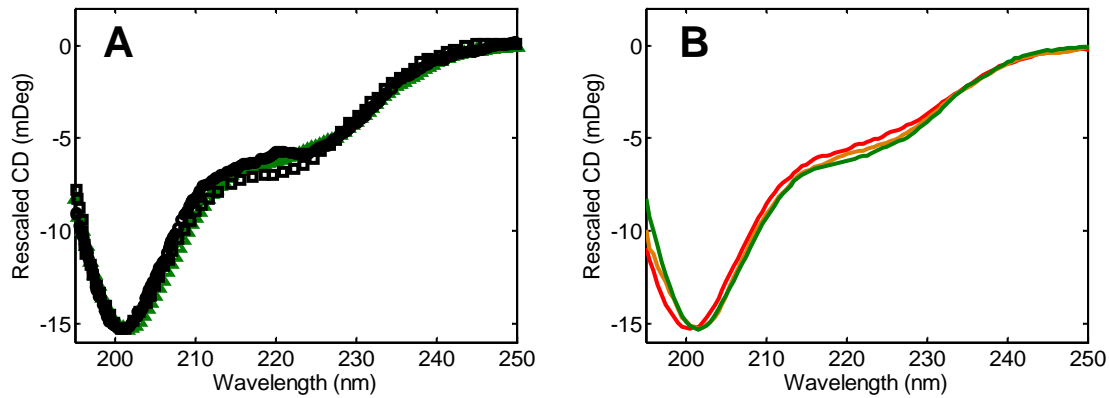

**Figure S1:** (A) Far-UV CD spectra of CGRP F37W at pH 8 at 20C (green triangles) compared to previously published data for CGRP wild-type by *Oconnell et al.* (Oconnell, J. P.; Kelly, S. M.; Raleigh, D. P.; Hubbard, J. A. M.; Price, N. C.; Dobson, C. M.; Smith, B. J. *Biochemical Journal* **1993**, 291, 205) (open black circles) and by *Manning et al.* (Manning, M. C. *Biochemical and Biophysical Research Communications* **1989**, 160, 388) (open black squares), rescaled by the signal at the minimum at 20C. The F37W mutation does not affect the secondary structure of CGRP. (B) Far-UV CD spectra of CGRP F37W at pH 3 (red), 4.9 (orange) and 8 (green) at 20C, normalized by the minima at 200 nm. No significant variation in secondary structure content as a function of pH is apparent, confirming previous far-UV CD measurements of wtCGRP in the same pH range (Hubbard, J. A. M.; Martin, S. R.; Chaplin, L. C.; Bose, C.; Kelly, S. M.; Price, N. C. *Biochemical Journal* **1991**, 275, 785).



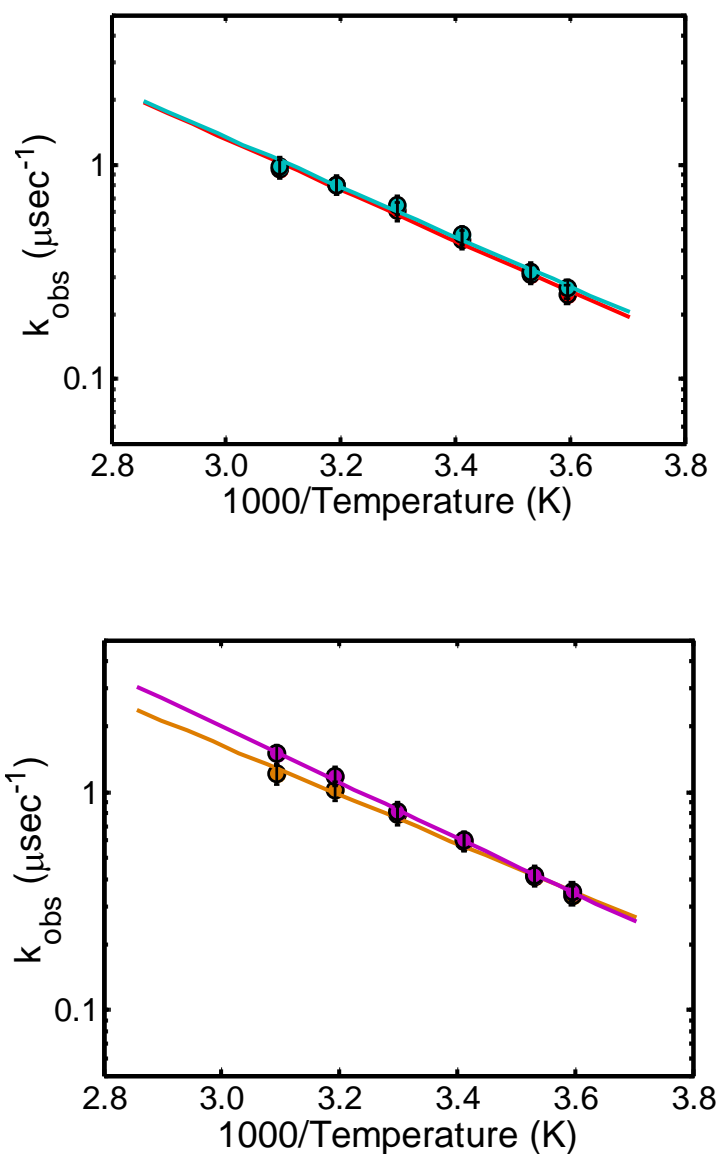

**Figure S2:** *Top:* Comparison of  $k_{obs}$  measured for D3N CGRP at pH 4.9 (cyan) and wt CGRP at pH 3 (red) corresponding to a peptide net charge of roughly +6 in both cases. The values of  $k_{obs}$  measured at both pH values are virtually indistinguishable. This confirms that the difference in  $k_{obs}$  measured for CGRP at pH 4.9 versus pH 3 (Figure 4 main text) is due to the loss of charge on the aspartic acid and not to other possible direct effects of pH. *Bottom:* comparison of  $k_{obs}$  for D3N CGRP at pH 8 (magenta) with wt CGRP at pH 4.9 (orange), both corresponding to a peptide net charge of about +5.

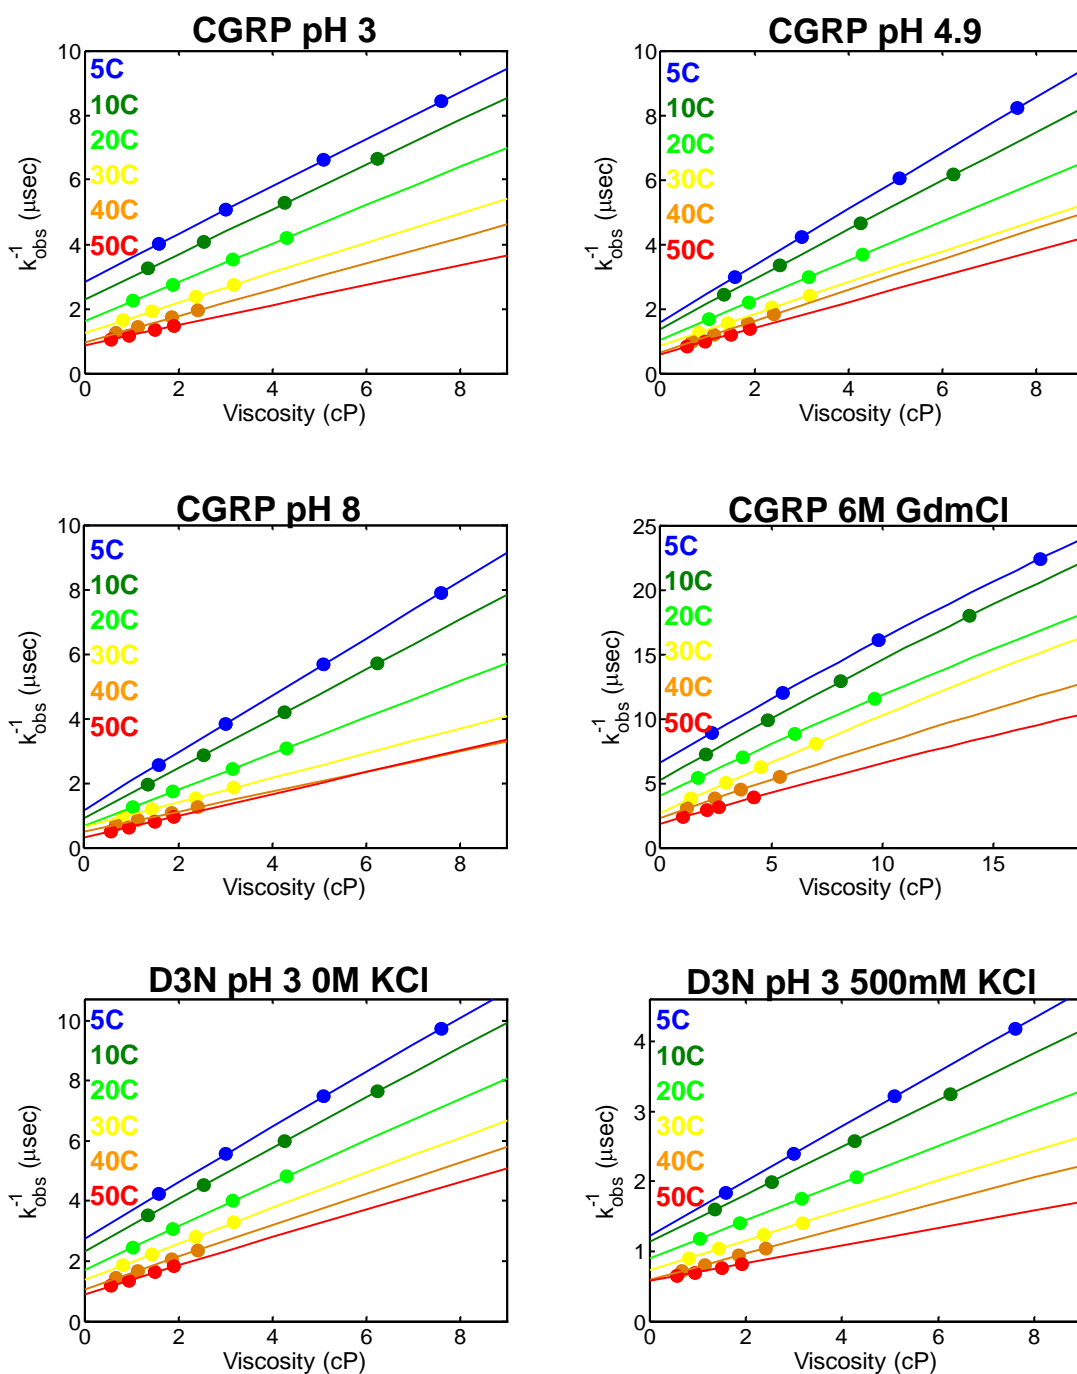

**Figure S3:** Results from global fits of the tryptophan triplet state decay curves (Figure 2 main text), at different temperatures and solvent viscosities, as described in Methods. Values of  $k_{obs}^{-1}$  obtained from global fits are plotted as a function of the solvent viscosity at each temperature. The reaction limited rate  $k_R(T)$ , is obtained from the y-intercept at each temperature, the diffusion limited rate  $k_{D+}$  from the slope at each temperature, as described in Methods (main text). For each peptide/solution condition a set of about 120 decay curves were used for the global fitting.

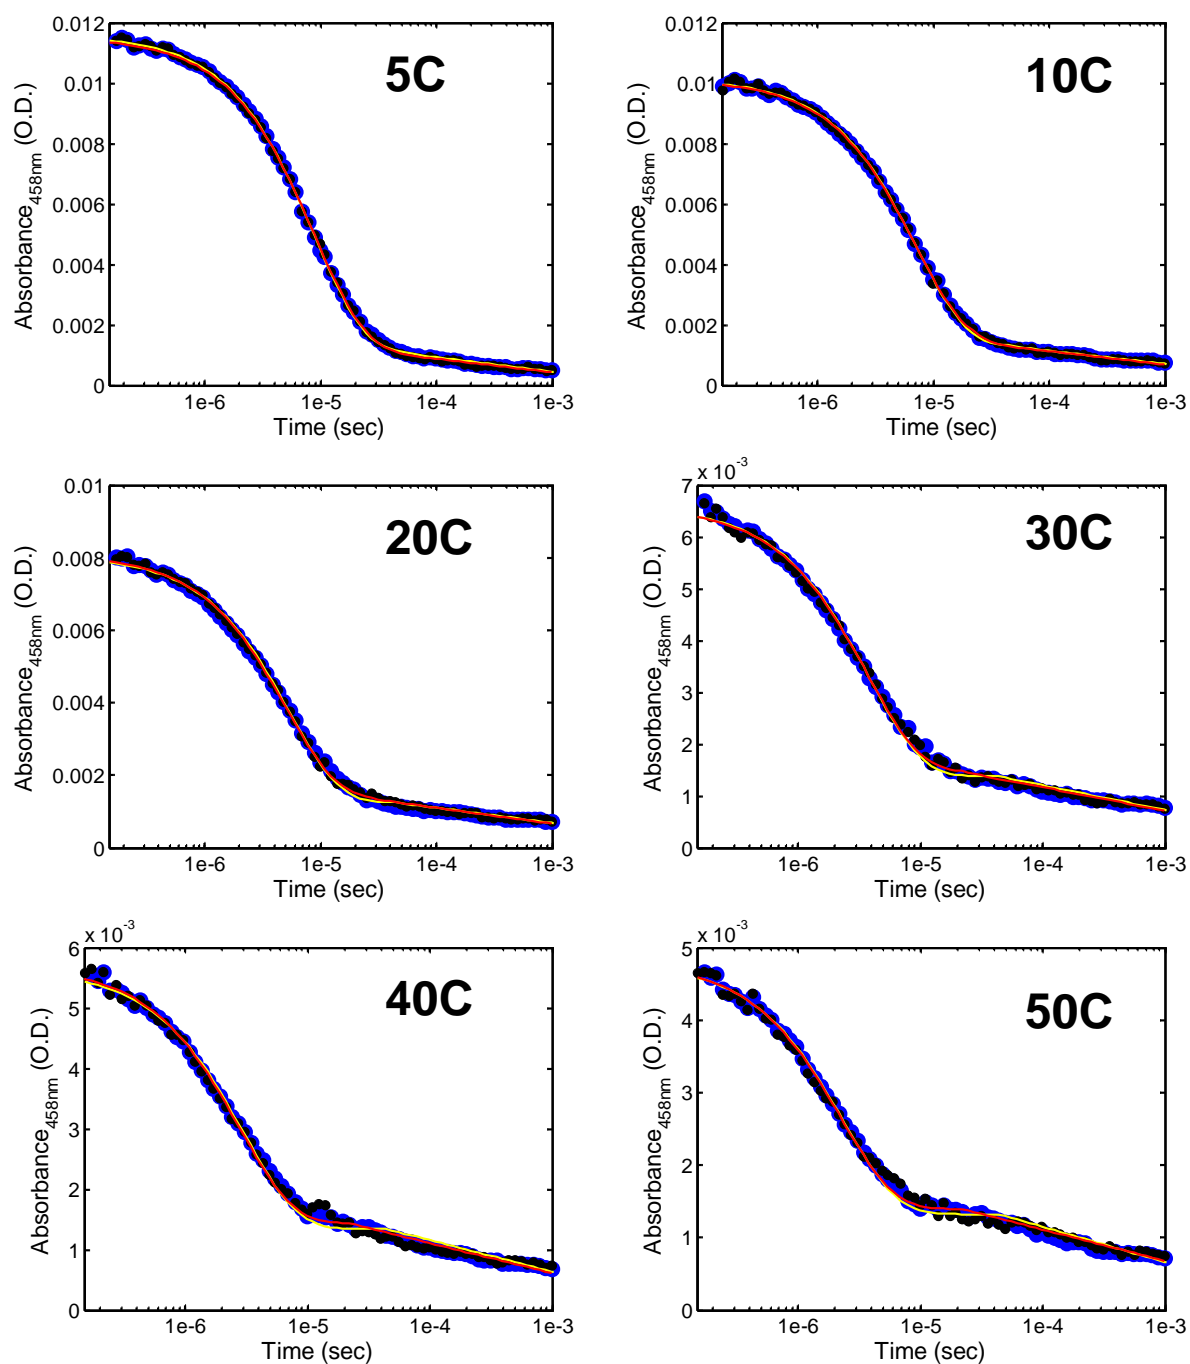

**Figure S4:** Tryptophan triplet state decay curves of *wt* CGRP at different temperatures in 6 M GdmCl, measured from the decay of tryptophan triplet-triplet absorption after nanosecond excitation. *Black circles:* data obtained from directly averaging all traces at each temperature; *blue circles:* data obtained after noise reduction by singular values decomposition (SVD), as described in the main text (data of Figure 2); *yellow lines:* best fit curves obtained by globally fitting the noise reduced data (blue points), as described in the main text (lines of Figure 2); *red*

*lines*: best fit curves obtained by directly fitting the average data at each temperature (black circles) individually.

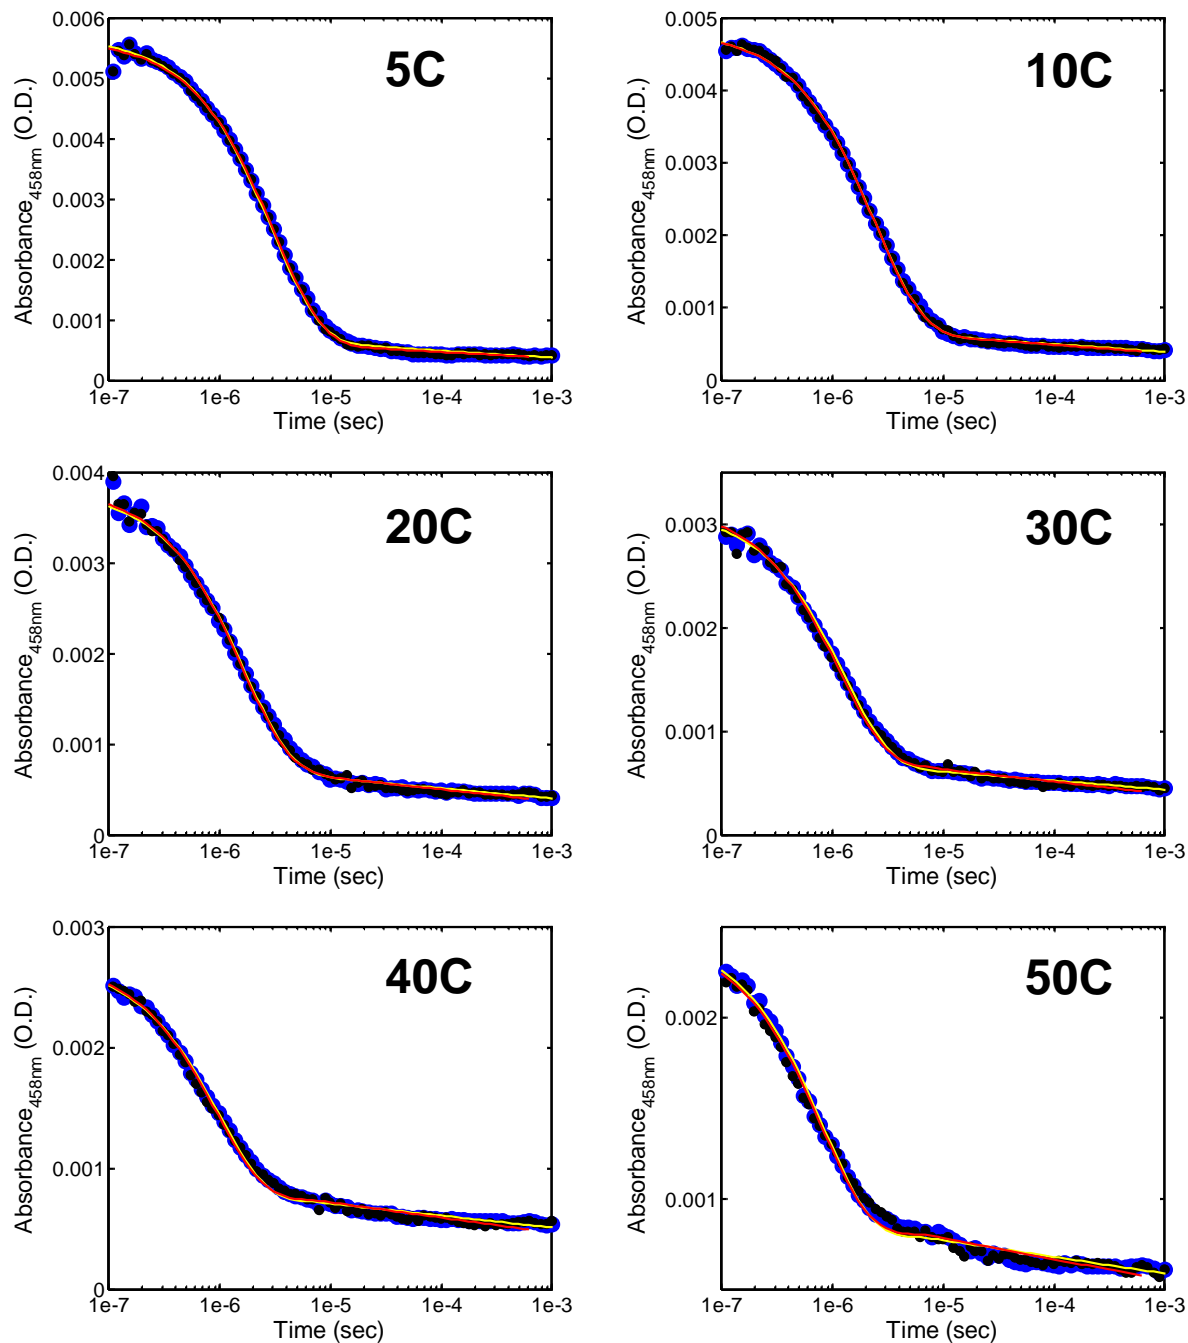

**Figure S5:** Tryptophan triplet state decay curves of *wt* CGRP at different temperatures in buffer at pH 4.9, measured from the decay of tryptophan triplet-triplet absorption after nanosecond excitation. *Black circles*: data obtained from directly averaging all traces at each temperature; *blue circles*: traces obtained after noise reduction by singular values decomposition (SVD), as described in the main text (data of Figure 2); *yellow lines*: best fit curves obtained by globally

fitting the noise reduced data (blue points), as described in the main text (lines of Figure 2); *red lines*: best fit curves obtained by fitting the average data at each temperature (black circles) individually.

| Temperature | SVD Global Fit ( $\mu\text{s}^{-1}$ ) |             | Individual Fit ( $\mu\text{s}^{-1}$ ) |             | Percent Difference |                |
|-------------|---------------------------------------|-------------|---------------------------------------|-------------|--------------------|----------------|
|             | 6M GdmCl                              | pH 4.9      | 6M GdmCl                              | pH 4.9      | 6M GdmCl           | pH 4.9         |
| <b>5C</b>   | 0.11 (0.12)                           | 0.34 (0.35) | 0.11 (0.12)                           | 0.32 (0.35) | 0.2% (-1.3%)       | 4.8% (1.3%)    |
| <b>10C</b>  | 0.14 (0.14)                           | 0.41 (0.41) | 0.14 (0.14)                           | 0.41 (0.41) | -2.0% (-2.0%)      | -0.5% (0.1%)   |
| <b>20C</b>  | 0.19 (0.19)                           | 0.59 (0.57) | 0.20 (0.19)                           | 0.62 (0.58) | -6.2% (-3.4%)      | -3.5% (-2.1%)  |
| <b>30C</b>  | 0.26 (0.25)                           | 0.79 (0.76) | 0.27 (0.26)                           | 0.87 (0.79) | -2.9% (-4.7%)      | -10.3% (-4.3%) |
| <b>40C</b>  | 0.33 (0.33)                           | 1.02 (1.00) | 0.36 (0.35)                           | 1.08 (1.06) | -8.1% (-5.9%)      | -6.2% (-6.3%)  |
| <b>50C</b>  | 0.42 (0.43)                           | 1.21 (1.29) | 0.44 (0.46)                           | 1.26 (1.39) | -5.3% (-7.1%)      | -4.3% (-8.3%)  |

**Table S1:** Comparison between the values of  $k_{obs}$  for wt CGRP (in units of inverse microseconds) obtained using two alternative methods of Figures S4 and S5: *i*) globally fitting the noise reduced SVD traces as described in the main text and used throughout the paper (these are best fit values corresponding to the yellow lines of Figures S4 and S5); *ii*) individually fitting each average trace at a given temperature. The numbers in parenthesis are the theoretical values obtained from a simple Arrhenius temperature fit of  $k_{obs}$  versus T and correspond to the straight lines of Figure 3 and 4 (these values at 20C are reported in Table 1).
